# Supplementary material for: Copper sulfide nanostructures: easy synthesis, photocatalytic and doxorubicin anticancer drug delivery applications
Source: Royal Society of Chemistry journal article supplement (doi:10.1039/d1nj04618g), 2021-01-01
Supplement: d1nj04618g1.pdf [file d1nj04618g1.pdf]

## **Supporting Information**

### **Copper Sulfide Nanostructures: Ease Synthesis, Photocatalytic and Doxorubicin Anticancer Drug Delivery Applications**

*Zahra Rafiee<sup>a</sup>, Fatemeh Davar<sup>a,\*</sup>, Saeed Hasani<sup>b</sup>, Ali Majedi<sup>a,c</sup> and Ahmed Esmail Shalan<sup>d, e,\*,+</sup>*

<sup>a</sup> Department of chemistry, Isfahan University of Technology, Isfahan, 84156-83111, Iran.

<sup>b</sup> Department of Material Engineering, Yazd University, P.O.Box 89195-741, Yazd, Iran.

<sup>c</sup> IQC center of Haerasa, Entekhab electronic group, Isfahan, Iran.

<sup>d</sup> BCMaterials, Basque Center for Materials, Applications and Nanostructures, Martina Casiano, UPV/EHU Science Park, Barrio Sarriena s/n, Leioa 48940, Spain.

<sup>e</sup> Central Metallurgical Research and Development Institute (CMRDI), P.O. Box 87, Helwan, Cairo 11421, Egypt.

*\*Corresponding authors. E-mail addresses: [davar@iut.ac.ir](mailto:davar@iut.ac.ir) (F. Davar), [a.shalan133@gmail.com](mailto:a.shalan133@gmail.com); [ahmed.shalan@bcmaterials.net](mailto:ahmed.shalan@bcmaterials.net) (A. E. Shalan).*

<sup>+</sup> Currently on leave from CMRDI

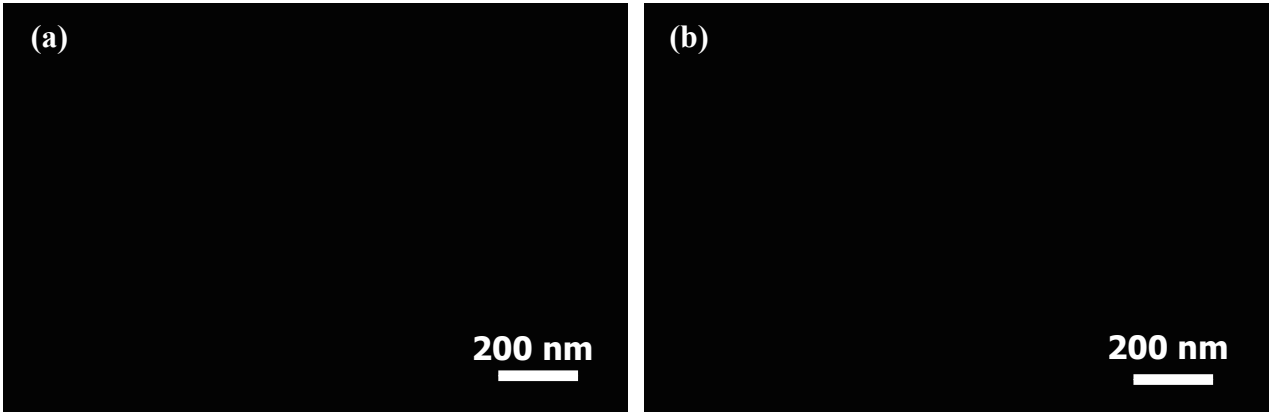

Figure S1: FE-SEM images of samples (a) R<sub>4</sub>-PEG, (b) R<sub>4</sub>-PEG/DOX.

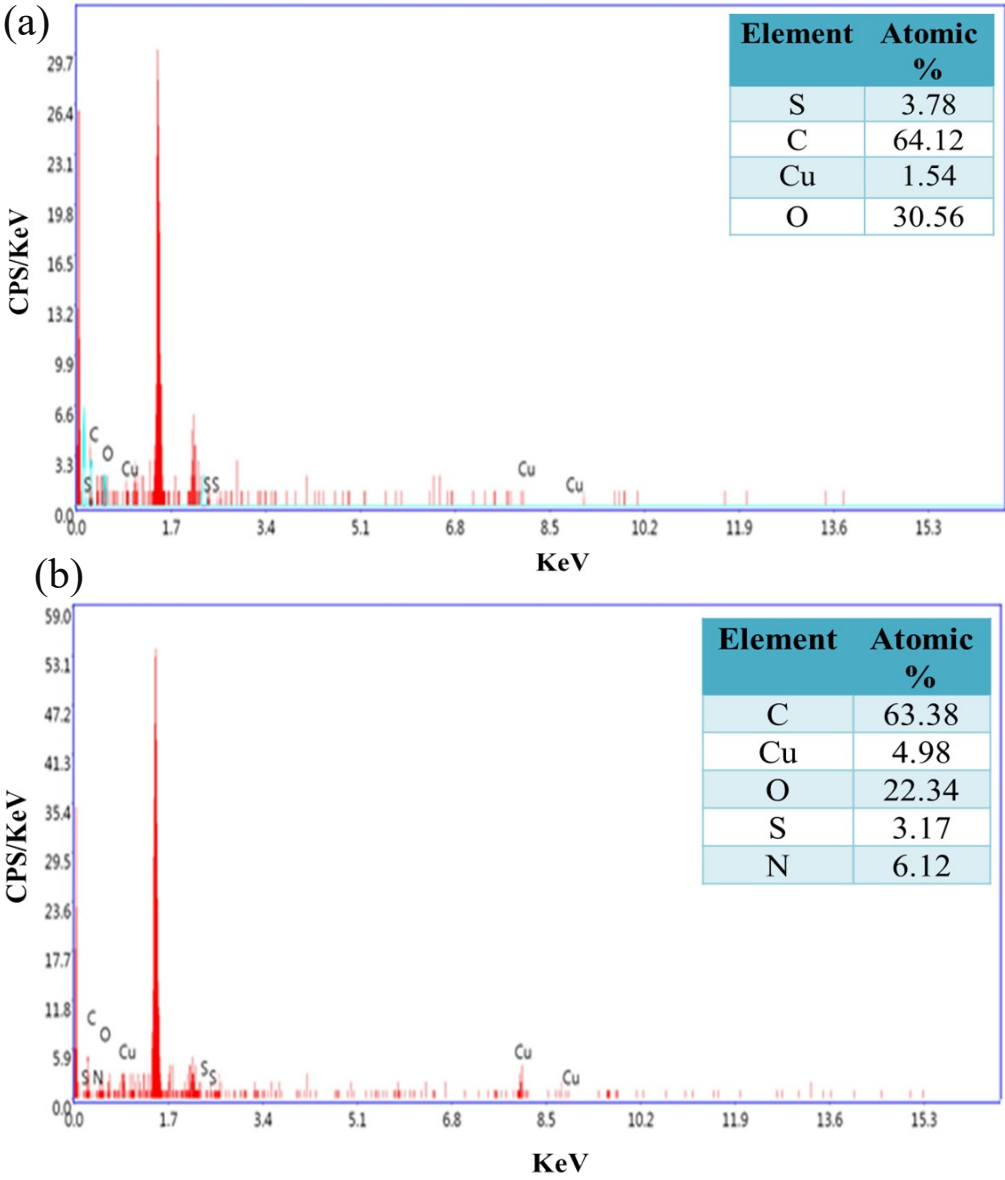

**Figure S2:** EDS analysis of samples (a) R<sub>4</sub>-PEG, (b) R<sub>4</sub>-PEG/DOX

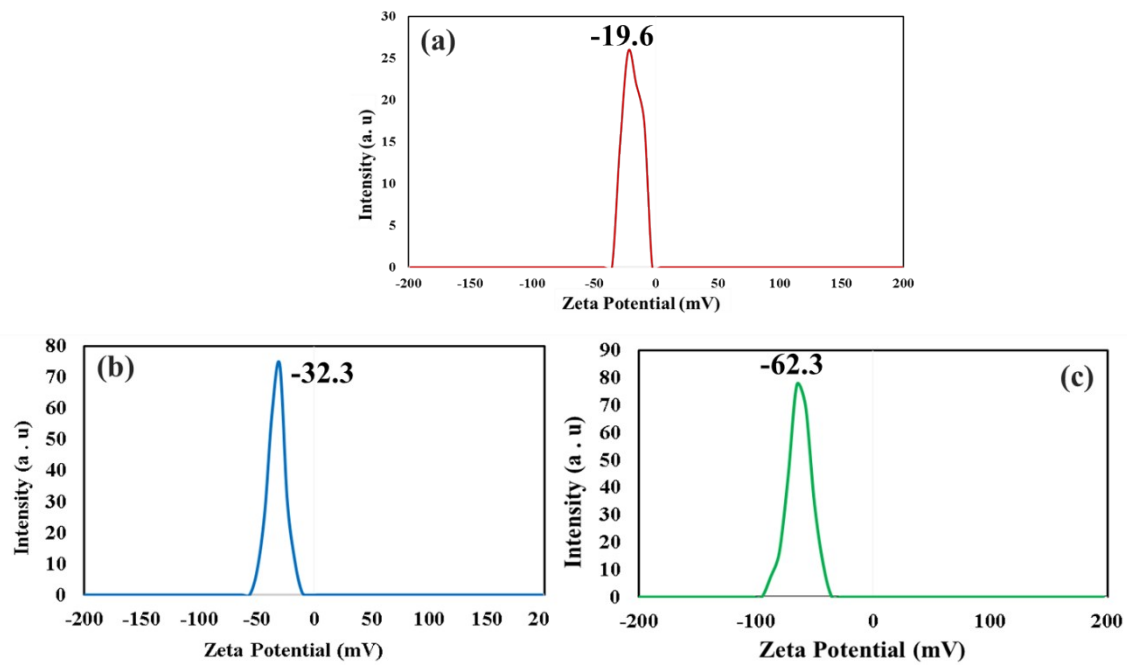

**Figure S3:** The zeta potential analysis of (a) R<sub>4</sub>, (b) R<sub>4</sub>-PEG, (c) R<sub>4</sub>-PEG/DOX

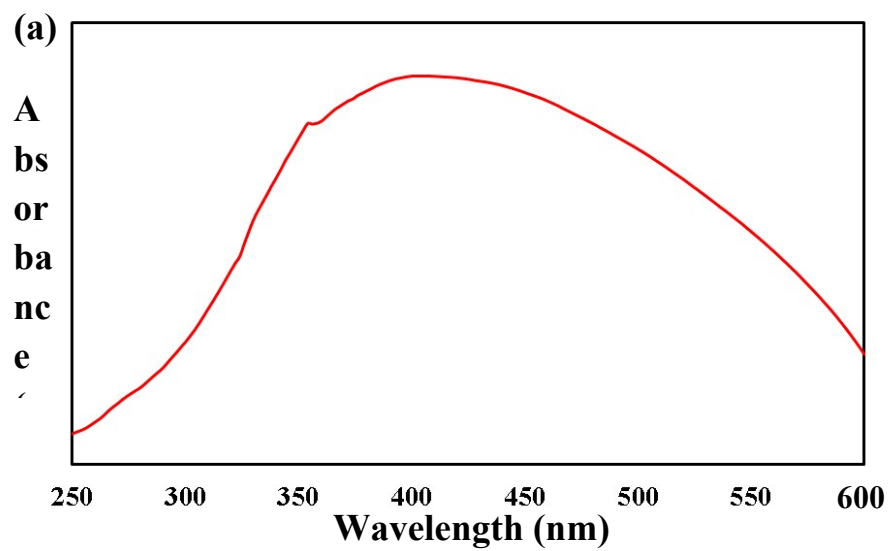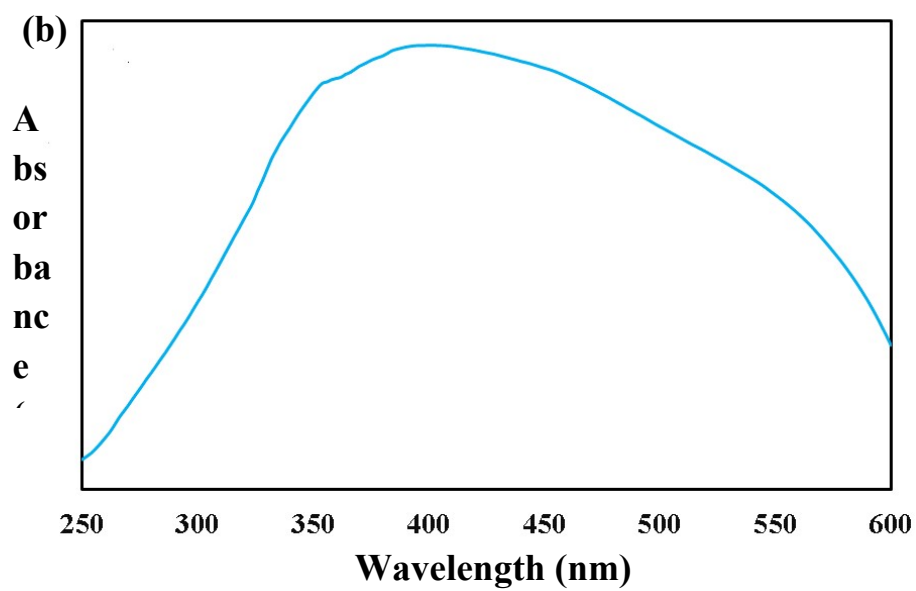

**Figure S4:** UV-Vis absorption spectra of (a) R<sub>4</sub> sample and (b) R<sub>6</sub> sample

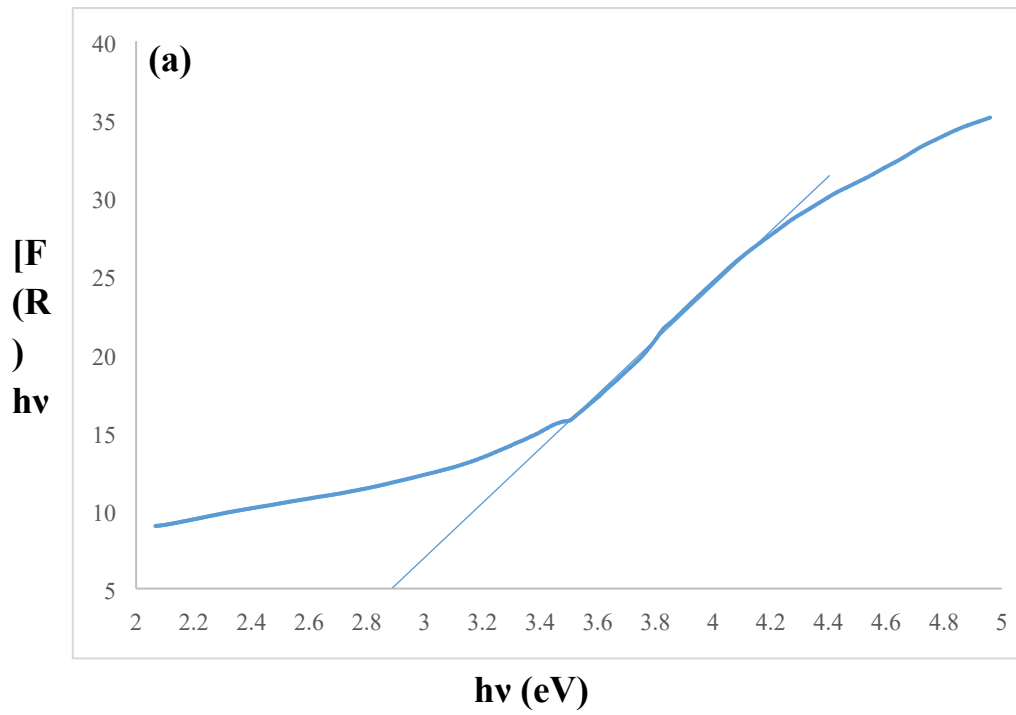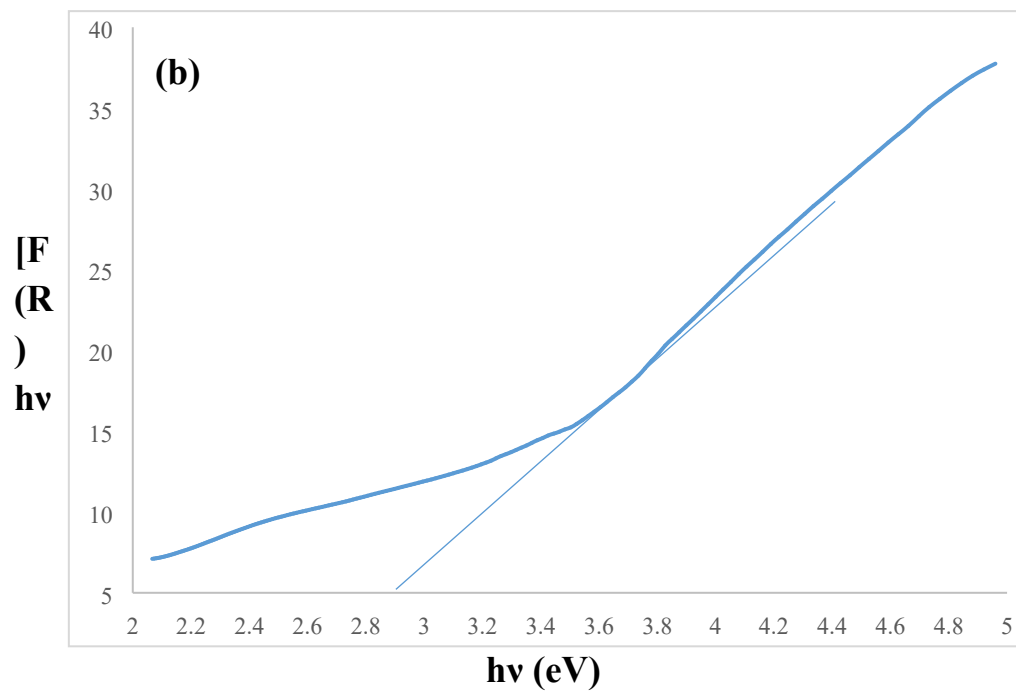

**Figure S5:** The band gap calculation of sample by Kubelka-Munk model (a) R<sub>4</sub>, (b) R<sub>6</sub>
